# Supplementary material for: Changes in the Active, Dead, and Dormant Microbial Community Structure across a Pleistocene Permafrost Chronosequence
Source: PubMed Central journal article supplement (PMC6585489; doi:10.1128/aem.02646-18), 2019-03-22
Supplement: AEM.02646-18-s0001.pdf [file AEM.02646-18-s0001.pdf]

1 **Supplementary Material**

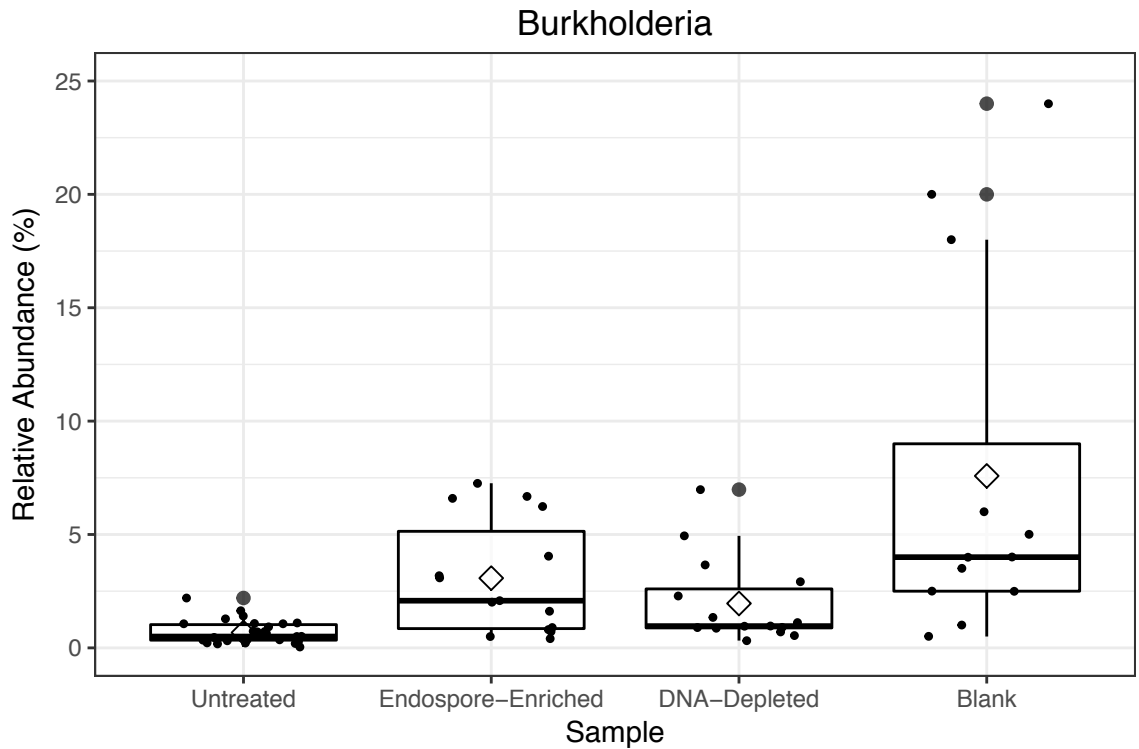

2

3 **Figure S1.** Relative abundance of the genera *Burkholderia* based on 16S rRNA gene  
4 sequences. This OTU was only abundant in samples with very low DNA yields (blank  
5 controls as well as endospore-enriched and DNA-depleted samples from the oldest time  
6 point) indicating it was likely the result of contamination. Therefore, this OTU was  
7 removed from subsequent analyses.

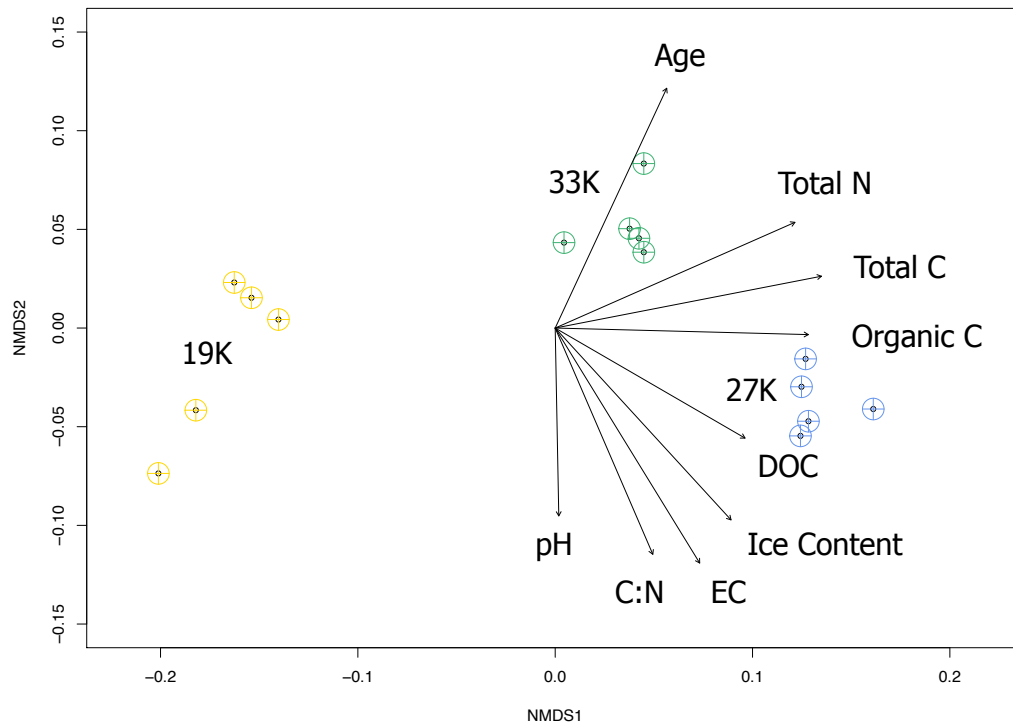

8

9 **Figure S2.** Non-metric multidimensional scaling (NMDS) based on weighted Unifrac

10 values of 16S rRNA gene sequences.

11 **Table S1.** Table of barcodes used on the 806R primer for each sample during  
 12 multiplexed sequencing.

| SampleID | BarcodeSequence | LinkerPrimerSequence | Treatment           | Age   |
|----------|-----------------|----------------------|---------------------|-------|
| D.19K6   | TGTGTAGCCATG    | GGACTACHVGGGTWTCTAAT | Endospore-Enriched  | 19K   |
| D.19K7   | GAGCATTACATG    | GGACTACHVGGGTWTCTAAT | Endospore-Enriched  | 19K   |
| D.19K8   | CGGAGAGACATG    | GGACTACHVGGGTWTCTAAT | Endospore-Enriched  | 19K   |
| D.19K9   | AGTCATCGAATG    | GGACTACHVGGGTWTCTAAT | Endospore-Enriched  | 19K   |
| D.19K10  | CAGCAGTCTTCG    | GGACTACHVGGGTWTCTAAT | Endospore-Enriched  | 19K   |
| D.27K6   | AGTGTGCGATTCG   | GGACTACHVGGGTWTCTAAT | Endospore-Enriched  | 27K   |
| D.27K7   | TGTCAGCTGTGCG   | GGACTACHVGGGTWTCTAAT | Endospore-Enriched  | 27K   |
| D.27K8   | AATAGCATGTGCG   | GGACTACHVGGGTWTCTAAT | Endospore-Enriched  | 27K   |
| D.27K9   | AACACTCGATCG    | GGACTACHVGGGTWTCTAAT | Endospore-Enriched  | 27K   |
| D.27K10  | TCTGGTGCATCG    | GGACTACHVGGGTWTCTAAT | Endospore-Enriched  | 27K   |
| D.33K6   | TTGACGACATCG    | GGACTACHVGGGTWTCTAAT | Endospore-Enriched  | 33K   |
| D.33K7   | ATAACATGTGCG    | GGACTACHVGGGTWTCTAAT | Endospore-Enriched  | 33K   |
| D.33K8   | ATAGACTCCG      | GGACTACHVGGGTWTCTAAT | Endospore-Enriched  | 33K   |
| D.33K9   | TGTACATCGCCG    | GGACTACHVGGGTWTCTAAT | Endospore-Enriched  | 33K   |
| D.33K10  | AGTAGACTTACG    | GGACTACHVGGGTWTCTAAT | Endospore-Enriched  | 33K   |
| D.Blank  | GATAACTGTACG    | GGACTACHVGGGTWTCTAAT | Endospore-Enriched  | Blank |
| DC.19K6  | GACATTGTCACG    | GGACTACHVGGGTWTCTAAT | NonEnriched-Control | 19K   |
| DC.19K7  | GGAGAGATCACG    | GGACTACHVGGGTWTCTAAT | NonEnriched-Control | 19K   |
| DC.19K8  | TGATAATGCACG    | GGACTACHVGGGTWTCTAAT | NonEnriched-Control | 19K   |
| DC.19K9  | CTGATGTACACG    | GGACTACHVGGGTWTCTAAT | NonEnriched-Control | 19K   |
| DC.19K10 | CACCTGTAGTAG    | GGACTACHVGGGTWTCTAAT | NonEnriched-Control | 19K   |
| DC.27K6  | CGATATCAGTAG    | GGACTACHVGGGTWTCTAAT | NonEnriched-Control | 27K   |
| DC.27K7  | AGTGC GTTCTAG   | GGACTACHVGGGTWTCTAAT | NonEnriched-Control | 27K   |
| DC.27K8  | AAGAGTCTCTAG    | GGACTACHVGGGTWTCTAAT | NonEnriched-Control | 27K   |
| DC.27K9  | CTGCATACTGAG    | GGACTACHVGGGTWTCTAAT | NonEnriched-Control | 27K   |
| DC.27K10 | ACTGTACATGAG    | GGACTACHVGGGTWTCTAAT | NonEnriched-Control | 27K   |
| DC.33K6  | TCTCATGTGGAG    | GGACTACHVGGGTWTCTAAT | NonEnriched-Control | 33K   |
| DC.33K7  | AGACAGTAGGAG    | GGACTACHVGGGTWTCTAAT | NonEnriched-Control | 33K   |
| DC.33K8  | CTGTCGTGTCAG    | GGACTACHVGGGTWTCTAAT | NonEnriched-Control | 33K   |
| DC.33K9  | CGCGTATCTCAG    | GGACTACHVGGGTWTCTAAT | NonEnriched-Control | 33K   |
| DC.33K10 | GACTCTGCTCAG    | GGACTACHVGGGTWTCTAAT | NonEnriched-Control | 33K   |
| DC.Blank | TAAGTACTGCAG    | GGACTACHVGGGTWTCTAAT | NonEnriched-Control | Blank |
| V.19K6   | TCACAGACAATG    | GGACTACHVGGGTWTCTAAT | DNA-Depleted        | 19K   |
| V.19K7   | ACGATCATCTGG    | GGACTACHVGGGTWTCTAAT | DNA-Depleted        | 19K   |
| V.19K8   | TGCATACACTGG    | GGACTACHVGGGTWTCTAAT | DNA-Depleted        | 19K   |
| V.19K9   | AGCTATGTATGG    | GGACTACHVGGGTWTCTAAT | DNA-Depleted        | 19K   |

|          |              |                      |                     |       |
|----------|--------------|----------------------|---------------------|-------|
| V.19K10  | ACACATAAGTCG | GGACTACHVGGGTWTCTAAT | DNA-Depleted        | 19K   |
| V.27K6   | GCGTAACTCTCG | GGACTACHVGGGTWTCTAAT | DNA-Depleted        | 27K   |
| V.27K7   | ATGTGCTGCTCG | GGACTACHVGGGTWTCTAAT | DNA-Depleted        | 27K   |
| V.27K8   | TACTGAGCCTCG | GGACTACHVGGGTWTCTAAT | DNA-Depleted        | 27K   |
| V.27K9   | TTCTAGAGTGCG | GGACTACHVGGGTWTCTAAT | DNA-Depleted        | 27K   |
| V.27K10  | AGTCTGTCTGCG | GGACTACHVGGGTWTCTAAT | DNA-Depleted        | 27K   |
| V.33K6   | TATACCGCTGCG | GGACTACHVGGGTWTCTAAT | DNA-Depleted        | 33K   |
| V.33K7   | GATCCTCATGCG | GGACTACHVGGGTWTCTAAT | DNA-Depleted        | 33K   |
| V.33K8   | CAGTCTAGTACG | GGACTACHVGGGTWTCTAAT | DNA-Depleted        | 33K   |
| V.33K9   | GCACGTTCTACG | GGACTACHVGGGTWTCTAAT | DNA-Depleted        | 33K   |
| V.33K10  | TTCGCAGATACG | GGACTACHVGGGTWTCTAAT | DNA-Depleted        | 33K   |
| V.Blank  | ATACAGCATACG | GGACTACHVGGGTWTCTAAT | DNA-Depleted        | Blank |
| VC.19K6  | CCTGATCACACG | GGACTACHVGGGTWTCTAAT | NonDepleted-Control | 19K   |
| VC.19K7  | GCTCTAGTAACG | GGACTACHVGGGTWTCTAAT | NonDepleted-Control | 19K   |
| VC.19K8  | GTGTACATAACG | GGACTACHVGGGTWTCTAAT | NonDepleted-Control | 19K   |
| VC.19K9  | TCTATGCGAACG | GGACTACHVGGGTWTCTAAT | NonDepleted-Control | 19K   |
| VC.19K10 | GATGTTGCTAG  | GGACTACHVGGGTWTCTAAT | NonDepleted-Control | 19K   |
| VC.27K6  | CTAGTGACCTAG | GGACTACHVGGGTWTCTAAT | NonDepleted-Control | 27K   |
| VC.27K7  | TCAGCTGACTAG | GGACTACHVGGGTWTCTAAT | NonDepleted-Control | 27K   |
| VC.27K8  | ACACGACTATAG | GGACTACHVGGGTWTCTAAT | NonDepleted-Control | 27K   |
| VC.27K9  | CGTACTCTCGAG | GGACTACHVGGGTWTCTAAT | NonDepleted-Control | 27K   |
| VC.27K10 | GATCTAATCGAG | GGACTACHVGGGTWTCTAAT | NonDepleted-Control | 27K   |
| VC.33K6  | TATATGTGCGAG | GGACTACHVGGGTWTCTAAT | NonDepleted-Control | 33K   |
| VC.33K7  | CTACTCCACGAG | GGACTACHVGGGTWTCTAAT | NonDepleted-Control | 33K   |
| VC.33K8  | TCTTCGCAGCAG | GGACTACHVGGGTWTCTAAT | NonDepleted-Control | 33K   |
| VC.33K9  | CTATGAGTCCAG | GGACTACHVGGGTWTCTAAT | NonDepleted-Control | 33K   |
| VC.33K10 | GTCATGCTCCAG | GGACTACHVGGGTWTCTAAT | NonDepleted-Control | 33K   |
| VC.Blank | TCATACAGCCAG | GGACTACHVGGGTWTCTAAT | NonDepleted-Control | Blank |

14 **Table S2.** Average percent difference in relative abundance between the endospore-enriched samples and non-enriched controls  
 15 across the three age categories. A negative value shows underrepresentation in the endospore-enriched sample compared to the non-  
 16 enriched control while a positive value shows overrepresentation. Values are averages of five replicate cores. U-value is a test statistic  
 17 generated during a Mann-Whitney-Wilcoxon test which represents the level of difference between two groups. Lower U-values  
 18 indicate that two groups are more different.

| Taxa                | 19K (%)       | U-value | 27K (%)       | U-value | 33K (%)       | U-value |
|---------------------|---------------|---------|---------------|---------|---------------|---------|
| Proteobacteria      | -4.3 ± 2.2    | 6       | -4.0 ± 0.3 ** | 0       | -6.2 ± 2.1    | 5       |
| Alphaproteobacteria | 3.6 ± 0.7     | 6       | -3.8 ± 0.3 ** | 0       | -0.6 ± 0.3    | 9       |
| Deltaproteobacteria | -8.8 ± 0.3 ** | 0       | -0.2 ± 0.1 *  | 1.5     | -6.0 ± 0.7 ** | 0       |
| Bacteroidetes       | -3.9 ± 0.7 ** | 0       | 0.0 ± 0.0     | 4.5     | -2.9 ± 0.9 ** | 0       |
| Acidobacteria       | -3.2 ± 0.3 *  | 0       | -0.1 ± 0.0 *  | 1.5     | -0.1 ± 0.1    | 4.5     |
| Chloroflexi         | -1.4 ± 0.3 ** | 0       | -0.6 ± 0.1 ** | 0       | -0.1 ± 0.1    | 7       |
| Planctomycetes      | -1.3 ± 0.1 ** | 0       | -0.8 ± 0.1 *  | 0       | -0.3 ± 0.1    | 4       |

(Mann-Whitney-Wilcoxon test, \*\* = p < 0.01, \* = p < 0.05)
